# Supplementary material for: H2S-removing UiO-66 MOFs for sensitized antibacterial therapy
Source: Royal Society of Chemistry journal article supplement (doi:10.1039/d3tb00552f), 2023-01-01
Supplement: d3tb00552f1.pdf [file d3tb00552f1.pdf]

## Electronic Supplementary Information

### **H<sub>2</sub>S-removing UiO-66 MOFs for sensitized antibacterial therapy**

Shaohu Huo,<sup>a, c#</sup> Qianhui Xie,<sup>b #</sup> Min Zhang,<sup>a, #</sup> Zitong Jiang,<sup>a</sup> Ling Fu,<sup>a</sup> Wenhong Li,<sup>a</sup> Chenrong Bian,<sup>a</sup> Kaile Wu,<sup>d</sup>  
\* Yulin Zhu,<sup>a, \*</sup> Xuan Nie,<sup>e, \*</sup> Shenggang Ding<sup>a, b, c \*</sup>

<sup>a</sup> Department of Pediatrics, The First Affiliated Hospital of Anhui Medical University, Hefei, Anhui 230022, China

<sup>b</sup> Department of Pediatrics, The Affiliated Chaohu Hospital of Anhui Medical University, Hefei, Anhui, 238000, China

<sup>c</sup> Beijing Children's Hospital, Capital Medical University, China National Clinical Research Center of Respiratory Diseases, Beijing, China, 100045

<sup>d</sup> Department of Otorhinolaryngology, Head and Neck Surgery, The First Affiliated Hospital of Anhui Medical University, Hefei, Anhui 230022, China

<sup>e</sup> CAS Key Laboratory of Soft Matter Chemistry, Department of Polymer Science and Engineering, University of Science and Technology of China, Hefei 230026, PR China

\* Author to whom correspondence should be addressed.

# These authors contributed equally to this work.

**Table S1.** Zone of inhibitions of UiO-66-NH<sub>2</sub>, UiO-66-MA, gentamicin (Gm), Gm@UiO-66-NH<sub>2</sub> and Gm@UiO-66-MA.

| Bacterium                           | Zone of inhibitions (mm) |           |            |                           |              |
|-------------------------------------|--------------------------|-----------|------------|---------------------------|--------------|
|                                     | UiO-66-NH <sub>2</sub>   | UiO-66-MA | Gm         | Gm@UiO-66-NH <sub>2</sub> | Gm@UiO-66-MA |
| <i>E. coli</i>                      | 0                        | 0         | 9.44±0.37  | 10.23±0.29                | 24.53±0.36   |
| <i>P. aeruginosa</i>                | 0                        | 0         | 16.19±0.42 | 17.28±0.35                | 29.85±0.27   |
| Gentamicin-resistant <i>E. coli</i> | 0                        | 0         | 0          | 0                         | 12.27±0.14   |

| Clinical examination and diagnosis report of the First Affiliated Hospital of Anhui Medical University |        |                               |                                                     |                              |                 |                               |
|--------------------------------------------------------------------------------------------------------|--------|-------------------------------|-----------------------------------------------------|------------------------------|-----------------|-------------------------------|
| Bacterial species: <i>E. coli</i>                                                                      |        |                               | Item: Common bacterial culture and drug sensitivity |                              |                 |                               |
| Antibiotic                                                                                             | KB(mm) | MIC( $\mu$ g/mL)              | Result                                              | Sensitivity (S)              | Intermediar (I) | Resistance (R)                |
| Ampicillin sulbactam                                                                                   |        | $\geq 32.0$                   | R                                                   | $\leq 8.0$                   | 16.0            | $\geq 32.0$                   |
| Cefazolin                                                                                              |        | $\geq 64.0$                   | R                                                   | $\leq 2.0$                   | 4.0             | $\geq 8.0$                    |
| Cefotetan                                                                                              |        | $\leq 4.0$                    | S                                                   | $\leq 16.0$                  | 32.0            | $\geq 64.0$                   |
| Aztreonam                                                                                              |        | $\leq 1.0$                    | S                                                   | $\leq 4.0$                   | 8.0             | $\geq 16.0$                   |
| Ertapenem                                                                                              |        | $\leq 0.5$                    | S                                                   | $\leq 0.5$                   | 1.0             | $\geq 2.0$                    |
| <b>Gentamicin</b>                                                                                      |        | <b><math>\geq 16.0</math></b> | <b>R</b>                                            | <b><math>\leq 4.0</math></b> | <b>8.0</b>      | <b><math>\geq 16.0</math></b> |
| Tobramycin                                                                                             |        | 8.0                           | I                                                   | $\leq 4.0$                   | 8.0             | $\geq 16.0$                   |
| Selectrin                                                                                              |        | $\geq 320.0$                  | R                                                   | $\leq 40.0$                  |                 | $\geq 80.0$                   |
| Amikacin                                                                                               |        | $\leq 2.0$                    | S                                                   | $\leq 16.0$                  | 32.0            | $\geq 64.0$                   |
| Amoxicillin tazobactam                                                                                 |        | $\leq 4.0$                    | S                                                   | $\leq 8.0$                   |                 | $\geq 32.0$                   |
| Cefazidime                                                                                             |        | $\leq 1.0$                    | S                                                   | $\leq 4.0$                   | 8.0             | $\geq 16.0$                   |
| Ciprofloxacin                                                                                          |        | $\geq 4.0$                    | R                                                   | $\leq 0.2$                   | 0.5             | $\geq 1.0$                    |
| Cefepime                                                                                               |        | $\leq 1.0$                    | S                                                   | $\leq 2.0$                   |                 | $\geq 16.0$                   |
| Imipenem                                                                                               |        | $\leq 1.0$                    | S                                                   | $\leq 1.0$                   | 2.0             | $\geq 4.0$                    |
| levofloxacin                                                                                           |        | $\geq 8.0$                    | R                                                   | $\leq 2.0$                   | 4.0             | $\geq 8.0$                    |
| Ceftriaxone                                                                                            |        | 16.0                          | R                                                   | $\leq 1.0$                   | 2.0             | $\geq 4.0$                    |
| Ampicillin                                                                                             |        | $\geq 32.0$                   | R                                                   | $\leq 8.0$                   | 16.0            | $\geq 32.0$                   |
| Piperacillin                                                                                           | 9      |                               | R                                                   | $\geq 21.0$                  | 18-20           | $\leq 17.0$                   |
| Cefturoxime                                                                                            | 6      |                               | R                                                   | $\geq 23.0$                  | 15-22           | $\leq 14.0$                   |
| Cefotaxime                                                                                             | 11     |                               | R                                                   | $\geq 26.0$                  | 23-25           | $\leq 22.0$                   |
| Cefmetazole                                                                                            | 26     |                               | S                                                   | $\geq 16.0$                  | 13-15           | $\leq 12.0$                   |
| Meropenem                                                                                              | 30     |                               | S                                                   | $\geq 23.0$                  | 20-22           | $\leq 19.0$                   |
| Cefperazone-Sulbactam                                                                                  | 18     |                               | I                                                   | $\geq 21.0$                  | 16-20           | $\leq 15.0$                   |
| Minocycline                                                                                            | 25     |                               | S                                                   | $\geq 16.0$                  | 13-15           | $\leq 12.0$                   |
| Tigecycline                                                                                            | 24     |                               | S                                                   | $\geq 19.0$                  | 15-18           | $\leq 14.0$                   |

**Fig. S1** Multiple antibiotic resistant information of *E. coli* provided by the Clinical Laboratory of the First Affiliated Hospital of Anhui Medical University.

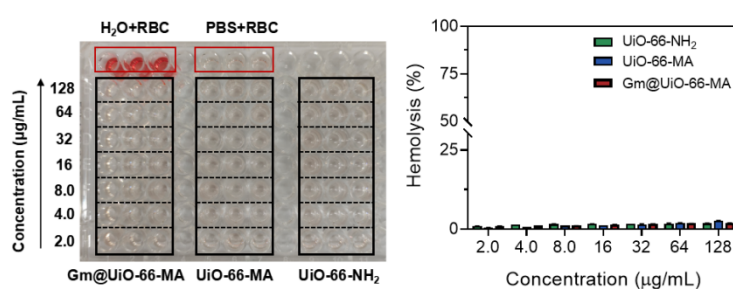

**Fig. S2** Hemolytic activities of UiO-66-NH<sub>2</sub>, UiO-66-MA and UiO-66-MA@Gm for red blood cell.

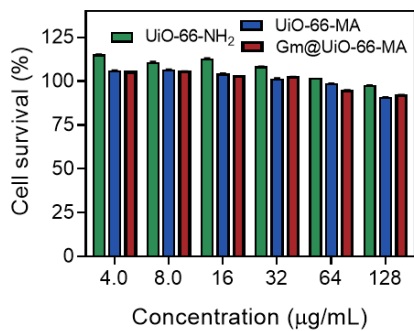

**Fig. S3** The cytotoxicity of UiO-66-NH<sub>2</sub>, UiO-66-MA and UiO-66-MA@Gm.

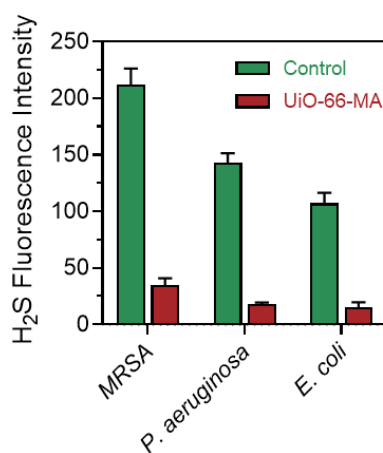

**Fig. S4** H<sub>2</sub>S produced by Multidrug-resistant *Staphylococcus aureus* (MRSA), *P. aeruginosa* and *E. coli* was removed by UiO-66-MA (100 µg/mL).

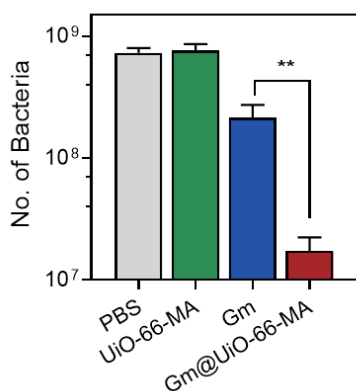

**Fig. S5** Bacterial counting of *E. coli* live/dead staining after treatment with UiO-66-MA, gentamicin, Gm@UiO-66-NH<sub>2</sub>, and Gm@UiO-66-MA.

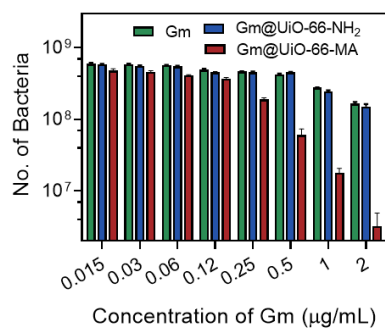

**Fig. S6** Bacterial counting of *E. coli* after treatment with UiO-66-MA, gentamicin, Gm@UiO-66-NH<sub>2</sub>, and Gm@UiO-66-MA.

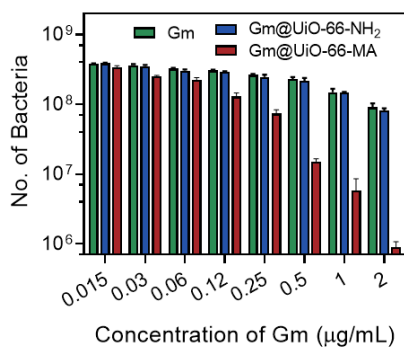

**Fig. S7** Bacterial counting of *P. aeruginosa* after treatment with UiO-66-MA, gentamicin, Gm@UiO-66-NH<sub>2</sub>, and Gm@UiO-66-MA.

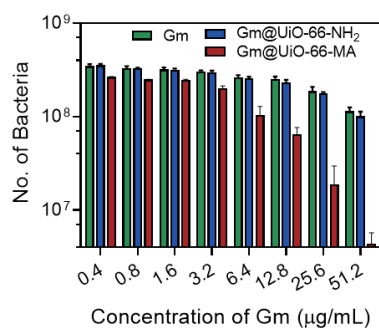

**Fig. S8** Bacterial counting of gentamicin-tolerant *E. coli* after treatment with UiO-66-MA, gentamicin, Gm@UiO-66-NH<sub>2</sub>, and Gm@UiO-66-MA.

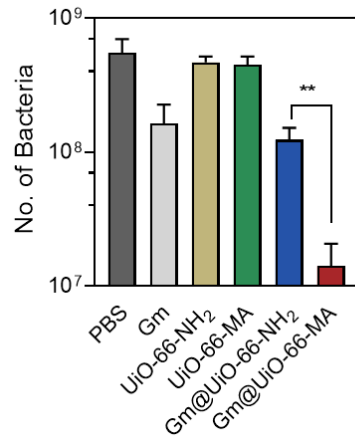

**Fig. S9** Bacterial counting of *MRSA* in biofilms after treatment.

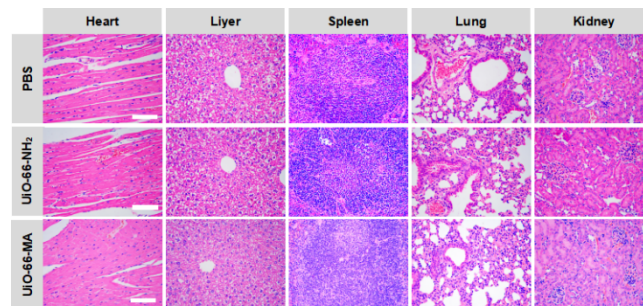

**Fig. S10** H&E staining of the main organs (heart, liver, spleen, lung, and kidney) after intravenous injection of UiO-66-NH<sub>2</sub> and UiO-66-MA. Scale bar, 20  $\mu$ m.

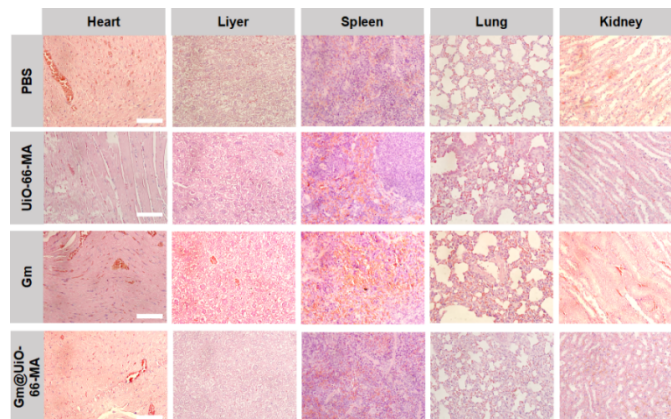

**Fig. S11** H&E staining of the main organs (heart, liver, spleen, lung, and kidney) after treatment. Scale bar, 20  $\mu$ m.
